# Supplementary material
Source: Research Square preprint supplement (doi:10.21203/rs.3.rs-9405723/v1)
Supplement: Supplementary file 1 [file cadd48425560746a6473fdcb.docx]

***Supplementary material for***

**Multivariate synthesis optimization, comprehensive characterization, and surface ligand determination of palladium nanoparticles**

Eduardo Sidinei Chaves1,3*, Morgana Lurdes da Rocha1, Isabella Tavernaro2,

Ute Resch-Genger2* and Björn Meermann3*

1Federal University of Santa Catarina, Department of Chemistry, Florianópolis, Brazil.

2Federal Institute for Materials Research and Testing, Division 1.2- Biophotonics, Berlin, Germany.

3Federal Institute for Materials Research and Testing, Division 1.1- Inorganic Trace Analysis (ITALab), Berlin, Germany.

* Corresponding authors: [ute.resch@bam.de](mailto:ute.resch@bam.de)

[bjoern.meermann@bam.de](mailto:bjoern.meermann@bam.de)

[eduardo.chaves@ufsc.br](mailto:eduardo.chaves@ufsc.br)

***Content:***

***Tables S1 to S10***

***Figures S1 to S7***

**Table S1.** Experiments, real and coded values for PdNP optimization 25-1 fractionated factorial design.

| | Experiment | Temperature  oC | Time  Min. | Pd  µmol | Ligand  mmol | Ascorbic Acid  mmol | 1-PDI | | --- | --- | --- | --- | --- | --- | --- | | 1 | 25 (-1) | 30 (-1) | 2 (-1) | 0.02 (-1) | 0.25 (+1) | 0.800 | | 2 | 25 (-1) | 30 (-1) | 2 (-1) | 0.14 (+1) | 0.05 (-1) | 0.793 | | 3 | 25 (-1) | 30 (-1) | 16 (+1) | 0.02 (-1) | 0.05 (-1) | 0.700 | | 4 | 25 (-1) | 30 (-1) | 16 (+1) | 0.14(+1) | 0.25 (+1) | 0.731 | | 5 | 25 (-1) | 180 (+1) | 2 (-1) | 0.02 (-1) | 0.05 (-1) | 0.802 | | 6 | 25 (-1) | 180 (+1) | 2 (-1) | 0.14 (+1) | 0.25 (+1) | 0.792 | | 7 | 25 (-1) | 180 (+1) | 16 (+1) | 0.02 (-1) | 0.25 (+1) | 0.711 | | 8 | 25 (-1) | 180 (+1) | 16 (+1) | 0.14 (+1) | 0.05 (-1) | 0.755 | | 9 | 75 (+1) | 30 (-1) | 2 (-1) | 0.02 (-1) | 0.05 (-1) | 0.719 | | 10 | 75 (+1) | 30 (-1) | 2 (-1) | 0.14 (+1) | 0.25 (+1) | 0.752 | | 11 | 75 (+1) | 30 (-1) | 16 (+1) | 0.02 (-1) | 0.25 (+1) | 0.818 | | 12 | 75(+1) | 30 (-1) | 16 (+1) | 0.14 (+1) | 0.05 (-1) | 0.838 | | 13 | 75 (+1) | 180 (+1) | 2 (-1) | 0.02 (-1) | 0.25 (+1) | 0.747 | | 14 | 75 (+1) | 180 (+1) | 2 (-1) | 0.14 (+1) | 0.05 (-1) | 0.631 | | 15 | 75(+1) | 180 (+1) | 16 (+1) | 0.02 (-1) | 0.05 (-1) | 0.833 | | 16 | 75 (+1) | 180 (+1) | 16 (+1) | 0.14 (+1) | 0.25 (+1) | 0.841 | | 17 | 50 (0) | 105 (0) | 9 (0) | 0.080 (0) | 0.15 (0) | 0.833 | | 18 | 50 (0) | 105 (0) | 9 (0) | 0.080 (0) | 0.15 (0) | 0.824 | | 19 | 50 (0) | 105 (0) | 9 (0) | 0.080 (0) | 0.15 (0) | 0.805 | |
| --- | --- | --- | --- | --- | --- | --- | --- | --- | --- | --- | --- | --- | --- | --- | --- | --- | --- | --- | --- | --- | --- | --- | --- | --- | --- | --- | --- | --- | --- | --- | --- | --- | --- | --- | --- | --- | --- | --- | --- | --- | --- | --- | --- | --- | --- | --- | --- | --- | --- | --- | --- | --- | --- | --- | --- | --- | --- | --- | --- | --- | --- | --- | --- | --- | --- | --- | --- | --- | --- | --- | --- | --- | --- | --- | --- | --- | --- | --- | --- | --- | --- | --- | --- | --- | --- | --- | --- | --- | --- | --- | --- | --- | --- | --- | --- | --- | --- | --- | --- | --- | --- | --- | --- | --- | --- | --- | --- | --- | --- | --- | --- | --- | --- | --- | --- | --- | --- | --- | --- | --- | --- | --- | --- | --- | --- | --- | --- | --- | --- | --- | --- | --- | --- | --- | --- | --- | --- | --- | --- | --- |

Ligand: 3-mercaptopropionic acid (MPA)


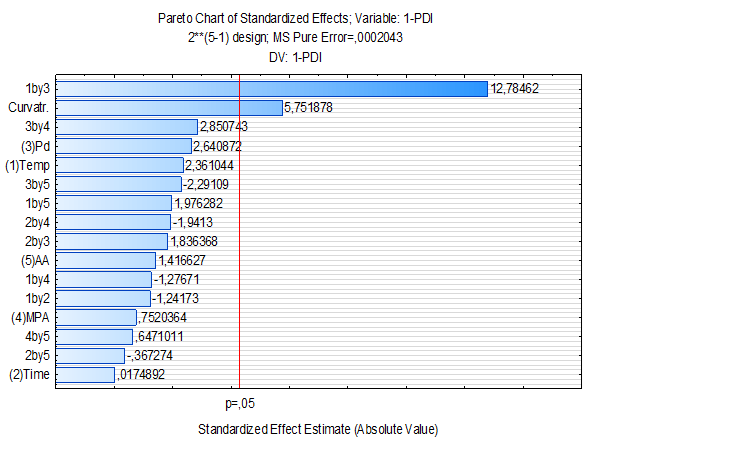
**Figure S1.** Pareto´s Chart for the fractionated factorial design 25-1 optimization of the water-based PdNPs synthesis. Effect of the synthesis´ parameters of the PdNPs, at a confidence level of 95%, significant effect on the PDI showed p<0.05.

**Table S****2.** ANOVA of the factorial 25-1 design optimization of the PdNPs synthesis capped with thiol-based ligand.

| Fator | SS | df | MS | F | p |
| --- | --- | --- | --- | --- | --- |
| Curvature | 0.006760 | 1 | 0.006760 | 33.0841 | 0.028921 |
| (1) Temperature, oC | 0.001139 | 1 | 0.001139 | 5.5745 | 0.142120 |
| (2) Time, min | 0.000000 | 1 | 0.000000 | 0.0003 | 0,987634 |
| (3) Pd, µ mol | 0.001425 | 1 | 0.001425 | 6.9742 | 0.118445 |
| (4) Ligand, m mol | 0.000116 | 1 | 0.000116 | 0.5656 | 0.530487 |
| (5) Ascorbic acid, m mol | 0.000410 | 1 | 0.000410 | 2.0068 | 0.292291 |
| 1 by 2 | 0.000315 | 1 | 0.000315 | 1.5419 | 0,340203 |
| 1 by 3 | 0.033398 | 1 | 0.033398 | 163.4465 | 0.006063 |
| 1 by 4 | 0,000333 | 1 | 0.000333 | 1.6300 | 0.329899 |
| 1 by 5 | 0.000798 | 1 | 0.000798 | 3.9057 | 0.186770 |
| 2 by 3 | 0.000689 | 1 | 0.000689 | 3.3722 | 0.207715 |
| 2 by 4 | 0.000770 | 1 | 0.000770 | 3.7687 | 0.191731 |
| 2 by 5 | 0.000028 | 1 | 0.000028 | 0.1349 | 0.748637 |
| 3 by 5 | 0.001661 | 1 | 0.001661 | 8.1267 | 0.104175 |
| 3 by 5 | 0.001073 | 1 | 0.001073 | 5.2491 | 0.149058 |
| 4 by 5 | 0.000086 | 1 | 0.000086 | 0.4187 | 0.583919 |
| Pure error | 0.000409 | 2 | 0.000204 |  |  |
| Total SS | 0.006760 | 18 |  |  |  |

R2:0.99173; Adj.: 0.92556; MS Pure error:0.0002043.

Ligand: 3-mercaptopropionic acid

**Table S3.** ANOVA of the Doehlert design optimization of the PdNPs synthesis capped with 3-mercaptopropionic acid (MPA) based on the 1-PDI.

| Fator | SS | df | MS | F | p |
| --- | --- | --- | --- | --- | --- |
| (1) Pd, µ mol (L) | 0.001752 | 1 | 0.001752 | 2.666794 | 0.244063 |
| Pd, µ mol (Q) | 0.000389 | 1 | 0.000389 | 0.591781 | 0.522161 |
| (2) Temperature, oC(L) | 0.001482 | 1 | 0.001482 | 2.256088 | 0.271931 |
| Temperature, oC(Q) | 0.000128 | 1 | 0.000128 | 0.195028 | 0.701923 |
| 1L by 2L | 0.000020 | 1 | 0.000020 | 0.030822 | 0.876805 |
| Lack of fit | 0.000840 | 1 | 0.000840 | 1.278792 | 0.375485 |
| Pure error | 0.001314 | 2 | 0.000657 |  |  |
| Total SS | 0.006040 | 8 |  |  |  |

R2:0.64366; Adj.: 0.04897; 2 factors;1 block, 9 runs; MS Pure error:0.000657.

**Table S4.** ANOVA of the Doehlert design optimization of the PdNPs synthesis capped with L-cysteine based on the 1-PDI.

| Fator | SS | df | MS | F | p |
| --- | --- | --- | --- | --- | --- |
| (1) Pd, µ mol (L) | 0.016576 | 1 | 0.016576 | 12.10540 | 0.073604 |
| Pd, µ mol (Q) | 0.002803 | 1 | 0.002803 | 2.04722 | 0.288780 |
| (2) Temperature, oC(L) | 0.000121 | 1 | 0.000121 | 0. 08836 | 0.794300 |
| Temperature, oC(Q) | 0.005603 | 1 | 0.005603 | 4.09202 | 0.180426 |
| 1L by 2L | 0.000784 | 1 | 0.000784 | 0.57254 | 0.528239 |
| Lack of fit | 0.000451 | 1 | 0.000451 | 0.32911 | 0.624095 |
| Pure error | 0.002739 | 2 | 0.001369 |  |  |
| Total SS | 0.027776 | 8 |  |  |  |

R2:0.88518; Adj.: 0.69381; 2 factors;1 block, 9 runs; MS Pure error:0.0013693.

**Figure S2.** Sulfur concentration in the PdNP-MPA and PdNP-Cys supernatant according to the washing cycles.

**Table S5.** ANOVA from pared t-test with 95% of confidence, comparing NTA and DLS data

|  | *DLS* | *NTA* |
| --- | --- | --- |
| Mean | 136 | 127,5 |
| Variance | 1250 | 480,5 |
| Observations | 2 | 2 |
| Pearson Correlation | 1 |  |
| Hypothesized Mean Difference | 0 |  |
| df | 1 |  |
| T Stat t | 0.894737 |  |
| P(T<=t) one-tail | 0.267666 |  |
| t critical one-tail | 6.313752 |  |
| P(T<=t) two-tail | 0.535331 |  |
| t critical two-tail | 12.7062 |  |


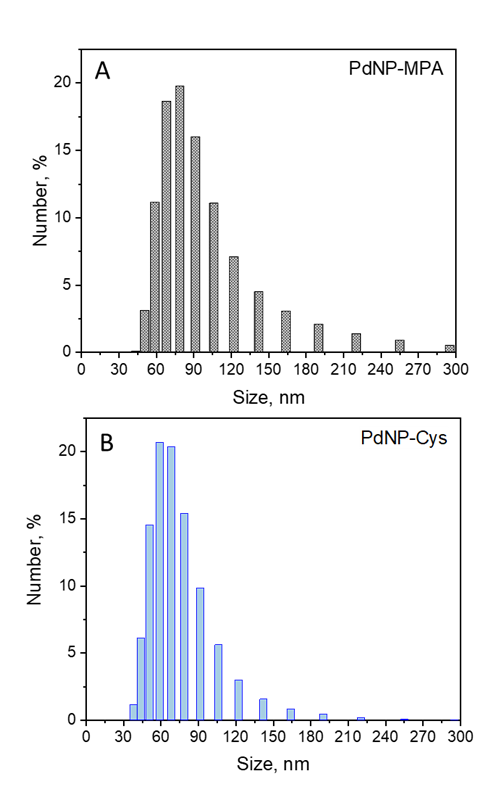


**Figure S3.** DLS number-based size distribution for PdNP-MPA and PdNP-Cys.

**
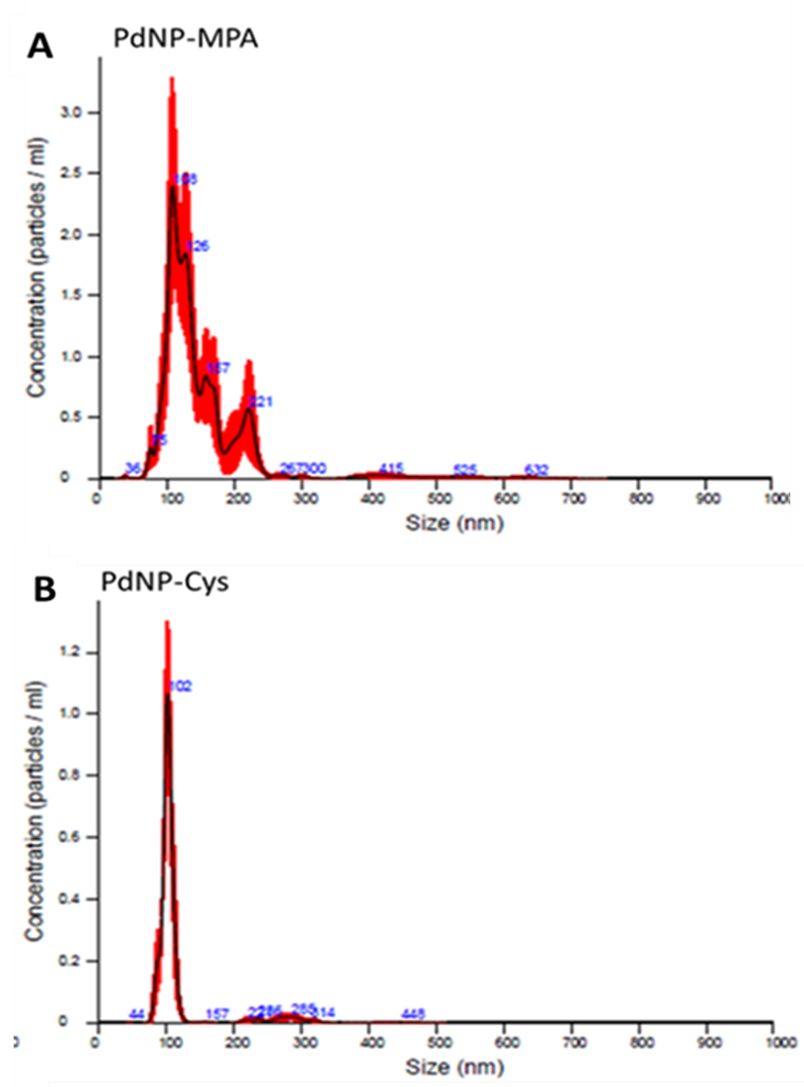
**

**Figure S4.** NTA particle size distribution for PdNP-MPA and PdNP-Cys.


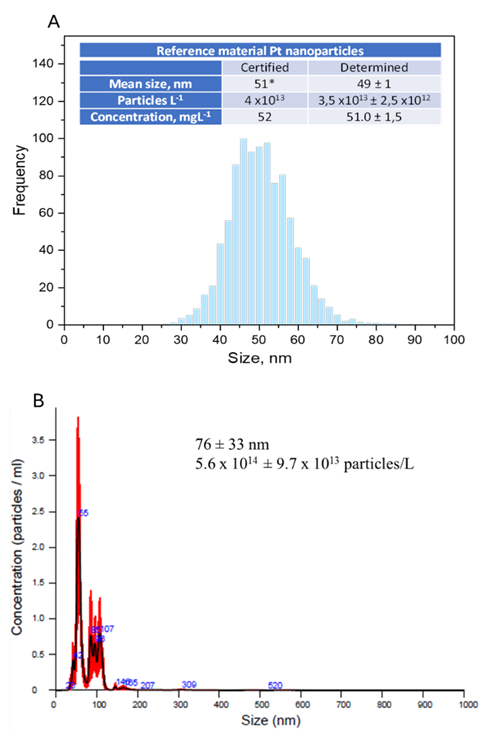


**Figure S5.** Size, size distribution and particle number obtained by (A) sp-ICP-MS and (B) NTA for reference material of PtNP.

**
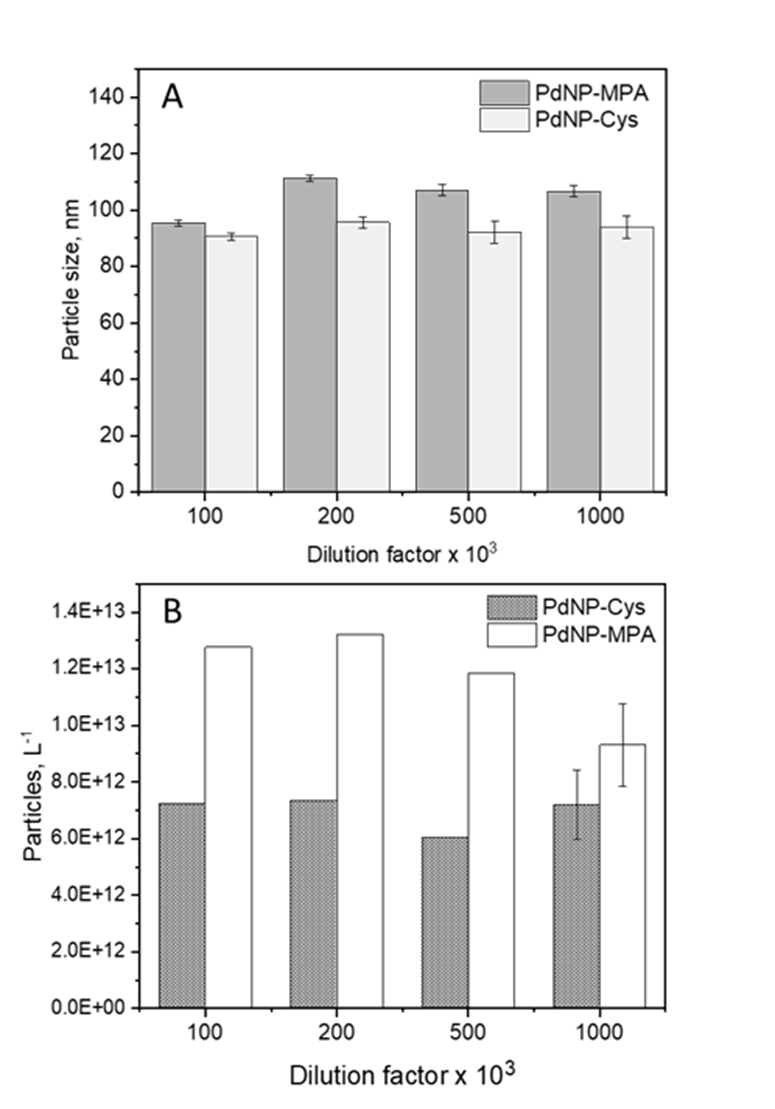
**

**Figure S6.** Dilution effect in the (A) particle size and (B) number obtained by sp-ICP-MS.

**Table S6.** ANOVA from pared t-test with 95% of confidence, comparing NTA and sp-ICP-MS data

|  | *Sp-ICP-MS* | *NTA* |
| --- | --- | --- |
| Mean | 1.63E+13 | 1.68E+15 |
| Variance | 1.01E+25 | 1.35E+29 |
| Observations | 2 | 2 |
| Pearson Correlation | 1 |  |
| Hypothesized Mean Difference | 0 |  |
| df | 1 |  |
| T Stat t | -6.4549 |  |
| P(T<=t) one-tail | 0.048924 |  |
| t critical one-tail | 6.313752 |  |
| P(T<=t) two-tail | 0.097848 |  |
| t critical two-tail | 12.7062 |  |

**Table S7.** ANOVA one-way with 95% of confidence, comparing the ligand density considering PdNP with different morphologies.

| *Source of Variation* | *SS* | *Df* | *MS* | *F* | *P-value* | *F crit* |
| --- | --- | --- | --- | --- | --- | --- |
| Between Groups | 18.30525742 | 4 | 4.576314354 | 1.609253 | 0.246545 | 3.47805 |
| Within Groups | 28.43750867 | 10 | 2.843750867 |  |  |  |
| Total | 46.74276609 | 14 |  |  |  |  |

**Table S8**. Variables, coded values, and levels for PdNPs synthesis by 25-1 fractionated factorial design.

| | **Variables** | **Levels** | | | | --- | --- | --- | --- | | **-1** | **0** | **+1** | | Temperature, oC | 25 | 50 | 75 | | Time, min. | 30 | 105 | 180 | | Pd, µmol | 2 | 9 | 16 | | Ligand, mmol | 0.02 | 0.08 | 0.14 | | Ascorbic acid, mmol | 0.05 | 0.15 | 0.25 | |
| --- | --- | --- | --- | --- | --- | --- | --- | --- | --- | --- | --- | --- | --- | --- | --- | --- | --- | --- | --- | --- | --- | --- | --- | --- | --- | --- | --- |

**Table S9.**  Coded and real variables for Doehlert design optimization of the PdNPs synthesis capped with 3-mercaptopropionic acid (MPA) and L-cysteine (Cys), based on the PDI results.

| Experiment | Factors | | MPA | | Cys | |
| --- | --- | --- | --- | --- | --- | --- |
| X1(Pd, µ mol) | X2 (T, oC) | PDI | 1-PDI | PDI | 1-PDI |
| 1 | -1 (10) | 0 (60) | 0.237 | 0.763 | 0.181 | 0.819 |
| 2 | -0.5 (15) | -0.866 (40) | 0.244 | 0.756 | 0.229 | 0.771 |
| 3 | -0.5 (15) | 0.866 (80) | 0.201 | 0.799 | 0.212 | 0.788 |
| 4 | 0.5 (25) | -0.866 (40) | 0.239 | 0.761 | 0.258 | 0.742 |
| 5 | 0.5 (25) | 0.866 (80) | 0.205 | 0.795 | 0.297 | 0.703 |
| 6 | 1 (30) | 0 (60) | 0.165 | 0.835 | 0.347 | 0.653 |
| 7 | 0 (20) | 0 (60) | 0.243 | 0.757 | 0.289 | 0.711 |
| 8 | 0 (20) | 0 (60) | 0.222 | 0.778 | 0.293 | 0.707 |
| 9 | 0 (20) | 0 (60) | 0.192 | 0.808 | 0.355 | 0.645 |


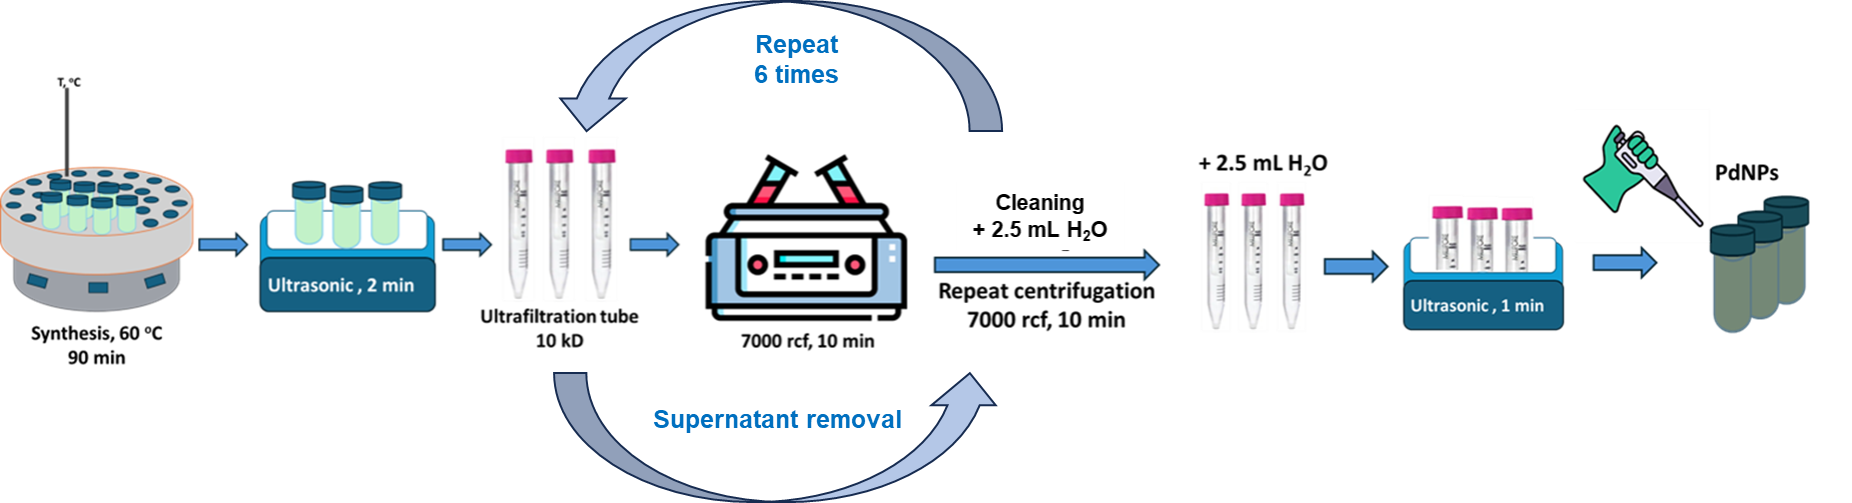


**Figure S7.** Schematic representation of the unbounded ligand removal of the PdNP-MPA and PdNP-Cys

**Table S10.** Instrumental parameters for the ICP-MS and sp-ICP-MS measurements.

| RF power, W | 1550 | |
| --- | --- | --- |
| Plasma gas flow rate, L min-1 | 15.0 | |
| Auxiliary gas flow rate L min-1 | 0.90 | |
| Nebulizer | Concentric | |
| sample uptake, mL min-1 | 0.346 | |
|  | ***sp-ICP-MS mode*** | ***ICP-MS mode*** |
| Torch injector | 1.5 mm | 2.5 mm |
| Dwell time, ms | 100 | 0.1 |
| Collision / Reaction gas | No gas | He: 5.5 mL min-1(Pd)  O2: 0.3 mL min-1 (S) |
| Gas flow nebulizer, L min-1 | 0.80 | 1.07 |
| Monitored isotopes | 105Pd, 194Pt | 32S, ³²S¹⁶O⁺, 105Pd, 103Rh (IS) |
|  |  |
| Limit of detection | LODsize 30 nm | Pd 10 ng L-1 |
| LODconc. 1.3 ng L-1 | Pd 17 ng L-1 |
|  |  |  |

.
